# Supplementary material
Source: PubMed Central journal article supplement (PMC2717277)
Supplement: mmc1.pdf [file mmc1.pdf]

Biophysical Journal, Volume 96

**Supporting Material**

**DNA Hairpins Containing the Cytidine Analog Pyrrolo-dC: Structural, Thermodynamic, and Spectroscopic Studies**

Xu Zhang and Randy M. Wadkins

<BELOW IS THE AMBER .frcmod FILE FOR MD SIMULATIONS OF DNA CONTAINING PdC>

remark goes here

MASS

|    |        |       |            |
|----|--------|-------|------------|
| C* | 12.010 | 0.360 | same as c2 |
| HA | 1.008  | 0.135 | same as hc |
| CC | 12.010 | 0.360 | same as c2 |
| CT | 12.010 | 0.878 | same as c3 |
| HC | 1.008  | 0.135 | same as hc |
| H2 | 1.008  | 0.135 | same as hc |
| N* | 14.010 | 0.530 | same as na |
| CM | 12.010 | 0.360 | same as c2 |
| H4 | 1.008  | 0.135 | same as ha |
| CB | 12.010 | 0.360 | same as c2 |
| NA | 14.010 | 0.530 | same as na |
| H  | 1.008  | 0.161 | same as hn |
| NC | 14.010 | 0.530 | same as n2 |
| C  | 12.010 | 0.616 | same as c  |
| O  | 16.000 | 0.434 | same as o  |
| OS | 16.000 | 0.465 | same as os |
| H1 | 1.008  | 0.135 | same as hc |
| P  | 30.970 | 1.538 | same as p4 |
| O2 | 16.000 | 0.434 | same as o  |
| OH | 16.000 | 0.465 | same as oh |
| HO | 1.008  | 0.135 | same as ho |

BOND

|       |        |       |                                  |
|-------|--------|-------|----------------------------------|
| C*-HA | 344.30 | 1.087 | same as c2-hc                    |
| C*-CC | 418.30 | 1.429 | same as cc-cc                    |
| C*-CB | 418.30 | 1.429 | same as cc-cc                    |
| CC-CT | 328.30 | 1.508 | same as c2-c3                    |
| CC-NA | 411.10 | 1.391 | same as c2-na                    |
| CT-HC | 337.30 | 1.092 | same as c3-hc                    |
| CT-H2 | 337.30 | 1.092 | same as c3-hc                    |
| CT-N* | 334.70 | 1.456 | same as c3-na                    |
| CT-OS | 301.50 | 1.439 | same as c3-os                    |
| CT-CT | 303.10 | 1.535 | same as c3-c3                    |
| N*-CM | 411.10 | 1.391 | same as c2-na                    |
| N*-C  | 424.00 | 1.383 | entered by Randy from parm99.dat |
| CM-H4 | 344.30 | 1.087 | same as c2-ha                    |
| CM-CB | 418.30 | 1.429 | same as cc-cc                    |
| CB-CB | 418.30 | 1.429 | same as cc-cc                    |
| CB-NA | 411.10 | 1.391 | same as c2-na                    |
| CB-NC | 431.60 | 1.376 | same as cc-nc                    |
| NA-H  | 406.60 | 1.011 | same as hn-na                    |
| NC-C  | 374.60 | 1.420 | same as c -n2                    |
| C -O  | 648.00 | 1.214 | same as c -o                     |
| CT-H1 | 337.30 | 1.092 | same as c3-hc                    |
| OS-P  | 311.60 | 1.636 | same as os-p4                    |
| P -O2 | 456.40 | 1.503 | same as o -p4                    |
| P -OH | 307.40 | 1.641 | same as oh-p4                    |
| CT-OH | 314.10 | 1.426 | same as c3-oh                    |
| OH-HO | 369.60 | 0.974 | same as ho-oh                    |

ANGLE

|          |        |         |                                    |
|----------|--------|---------|------------------------------------|
| C*-CC-CT | 64.300 | 123.420 | same as c2-c2-c3                   |
| C*-CC-NA | 69.800 | 121.380 | same as c2-c2-na                   |
| C*-CB-CM | 67.900 | 110.700 | same as cc-cc-cc                   |
| C*-CB-CB | 67.900 | 110.700 | same as cc-cc-cc                   |
| HA-C*-CC | 50.300 | 119.700 | same as c2-c2-hc                   |
| HA-C*-CB | 50.300 | 119.700 | same as c2-c2-hc                   |
| CC-C*-CB | 67.900 | 110.700 | same as cc-cc-cc                   |
| CC-CT-HC | 47.000 | 110.490 | same as c2-c3-hc                   |
| CC-NA-CB | 67.800 | 110.370 | same as c2-na-c2                   |
| CC-NA-H  | 47.600 | 119.280 | same as c2-na-hn                   |
| CT-CC-NA | 65.000 | 122.540 | same as c3-c2-na                   |
| HC-CT-HC | 39.400 | 108.350 | same as hc-c3-hc                   |
| CT-N*-CM | 64.200 | 117.200 | same as c2-na-c3                   |
| CT-N*-C  | 64.700 | 117.600 | same as c -na-c3                   |
| CT-OS-CT | 62.100 | 113.410 | same as c3-os-c3                   |
| CT-CT-CT | 63.200 | 110.630 | same as c3-c3-c3                   |
| CT-CT-HC | 33.235 | 109.490 | Calculated with empirical approach |

|          |        |         |                                    |
|----------|--------|---------|------------------------------------|
| H2-CT-N* | 49.900 | 109.500 | same as hc-c3-na                   |
| H2-CT-OS | 50.900 | 108.700 | same as hc-c3-os                   |
| H2-CT-CT | 46.400 | 110.050 | same as c3-c3-hc                   |
| N*-CT-OS | 71.200 | 109.190 | same as na-c3-os                   |
| N*-CT-CT | 65.800 | 112.590 | same as c3-c3-na                   |
| N*-CM-H4 | 51.200 | 112.420 | same as ha-c2-na                   |
| N*-CM-CB | 69.800 | 121.380 | same as c2-c2-na                   |
| N*-C -NC | 70.700 | 118.600 | same as n2-c -na                   |
| N*-C -O  | 75.000 | 122.850 | same as na-c -o                    |
| CM-N*-C  | 64.300 | 125.090 | same as c -na-c2                   |
| CM-CB-CB | 67.900 | 110.700 | same as cc-cc-cc                   |
| H4-CM-CB | 50.000 | 120.940 | same as c2-c2-ha                   |
| CB-CB-NA | 69.800 | 121.380 | same as c2-c2-na                   |
| CB-CB-NC | 70.000 | 113.420 | same as cc-cc-nc                   |
| CB-NA-H  | 47.600 | 119.280 | same as c2-na-hn                   |
| CB-NC-C  | 66.200 | 120.970 | same as c -n2-c2                   |
| NA-CB-NC | 71.700 | 123.620 | same as n2-c2-na                   |
| NC-C -O  | 73.000 | 122.500 | same as n2-c -o                    |
| OS-CT-CT | 67.800 | 108.420 | same as c3-c3-os                   |
| OS-CT-H1 | 50.900 | 108.700 | same as hc-c3-os                   |
| CT-CT-H1 | 46.400 | 110.050 | same as c3-c3-hc                   |
| CT-CT-OH | 67.700 | 109.430 | same as c3-c3-oh                   |
| CT-OS-P  | 77.600 | 117.480 | same as c3-os-p4                   |
| H1-CT-H1 | 39.400 | 108.350 | same as hc-c3-hc                   |
| OS-P -O2 | 43.100 | 116.670 | same as o -p4-os                   |
| OS-P -OH | 72.232 | 98.025  | Calculated with empirical approach |
| P -OH-HO | 55.300 | 110.190 | same as ho-oh-p4                   |
| O2-P -O2 | 45.100 | 117.220 | same as o -p4-o                    |
| O2-P -OH | 42.900 | 117.390 | same as o -p4-oh                   |
| CT-OH-HO | 47.100 | 108.160 | same as c3-oh-ho                   |
| H1-CT-OH | 51.100 | 109.500 | same as hc-c3-oh                   |

#### DIHE

|             |   |       |         |       |                    |
|-------------|---|-------|---------|-------|--------------------|
| C*-CC-CT-HC | 1 | 0.000 | 0.000   | 2.000 | same as X -c2-c3-X |
| C*-CC-NA-CB | 1 | 0.625 | 180.000 | 2.000 | same as X -c2-na-X |
| C*-CC-NA-H  | 1 | 0.625 | 180.000 | 2.000 | same as X -c2-na-X |
| C*-CB-CM-N* | 1 | 6.650 | 180.000 | 2.000 | same as X -c2-c2-X |
| C*-CB-CM-H4 | 1 | 4.000 | 180.000 | 2.000 | same as X -cc-cc-X |
| C*-CB-CB-NA | 1 | 6.650 | 180.000 | 2.000 | same as X -c2-c2-X |
| C*-CB-CB-NC | 1 | 4.000 | 180.000 | 2.000 | same as X -cc-cc-X |
| HA-C*-CC-CT | 1 | 6.650 | 180.000 | 2.000 | same as X -c2-c2-X |
| HA-C*-CC-NA | 1 | 6.650 | 180.000 | 2.000 | same as X -c2-c2-X |
| HA-C*-CB-CM | 1 | 6.650 | 180.000 | 2.000 | same as X -c2-c2-X |
| HA-C*-CB-CB | 1 | 6.650 | 180.000 | 2.000 | same as X -c2-c2-X |
| CC-C*-CB-CM | 1 | 4.000 | 180.000 | 2.000 | same as X -cc-cc-X |
| CC-C*-CB-CB | 1 | 4.000 | 180.000 | 2.000 | same as X -cc-cc-X |
| CC-NA-CB-CB | 1 | 0.625 | 180.000 | 2.000 | same as X -c2-na-X |
| CC-NA-CB-NC | 1 | 0.625 | 180.000 | 2.000 | same as X -c2-na-X |
| CT-CC-C*-CB | 1 | 6.650 | 180.000 | 2.000 | same as X -c2-c2-X |
| CT-CC-NA-CB | 1 | 0.625 | 180.000 | 2.000 | same as X -c2-na-X |
| CT-CC-NA-H  | 1 | 0.625 | 180.000 | 2.000 | same as X -c2-na-X |
| HC-CT-CC-NA | 1 | 0.000 | 0.000   | 2.000 | same as X -c2-c3-X |
| CT-N*-CM-H4 | 1 | 0.625 | 180.000 | 2.000 | same as X -c2-na-X |
| CT-N*-CM-CB | 1 | 0.625 | 180.000 | 2.000 | same as X -c2-na-X |
| CT-N*-C -NC | 1 | 1.450 | 180.000 | 2.000 | same as X -c -na-X |
| CT-N*-C -NC | 1 | 0.350 | 180.000 | 4.000 | same as X -c -na-X |
| CT-N*-C -O  | 1 | 1.450 | 180.000 | 2.000 | same as X -c -na-X |
| CT-N*-C -O  | 1 | 0.350 | 180.000 | 4.000 | same as X -c -na-X |
| CT-OS-CT-H1 | 1 | 0.383 | 0.000   | 3.000 | same as X -c3-os-X |
| CT-OS-CT-CT | 1 | 0.383 | 0.000   | 3.000 | same as X -c3-os-X |
| CT-CT-CT-CT | 1 | 0.156 | 0.000   | 3.000 | same as X -c3-c3-X |
| CT-CT-CT-H1 | 1 | 0.156 | 0.000   | 3.000 | same as X -c3-c3-X |
| CT-CT-CT-OH | 1 | 0.156 | 0.000   | 3.000 | same as X -c3-c3-X |
| H2-CT-N*-CM | 1 | 0.000 | 0.000   | 2.000 | same as X -c3-na-X |
| H2-CT-N*-C  | 1 | 0.000 | 0.000   | 2.000 | same as X -c3-na-X |
| H2-CT-OS-CT | 1 | 0.383 | 0.000   | 3.000 | same as X -c3-os-X |
| H2-CT-CT-CT | 1 | 0.156 | 0.000   | 3.000 | same as X -c3-c3-X |
| H2-CT-CT-HC | 1 | 0.156 | 0.000   | 3.000 | same as X -c3-c3-X |
| N*-CT-OS-CT | 1 | 0.383 | 0.000   | 3.000 | same as X -c3-os-X |
| N*-CT-CT-CT | 1 | 0.156 | 0.000   | 3.000 | same as X -c3-c3-X |
| N*-CT-CT-HC | 1 | 0.156 | 0.000   | 3.000 | same as X -c3-c3-X |
| N*-CM-CB-CB | 1 | 6.650 | 180.000 | 2.000 | same as X -c2-c2-X |

|             |   |       |         |       |                    |
|-------------|---|-------|---------|-------|--------------------|
| N*-C -NC-CB | 1 | 4.150 | 180.000 | 2.000 | same as X -c -n2-X |
| CM-N*-CT-OS | 1 | 0.000 | 0.000   | 2.000 | same as X -c3-na-X |
| CM-N*-CT-CT | 1 | 0.000 | 0.000   | 2.000 | same as X -c3-na-X |
| CM-N*-C -NC | 1 | 1.450 | 180.000 | 2.000 | same as X -c -na-X |
| CM-N*-C -NC | 1 | 0.350 | 180.000 | 4.000 | same as X -c -na-X |
| CM-N*-C -O  | 1 | 1.450 | 180.000 | 2.000 | same as X -c -na-X |
| CM-N*-C -O  | 1 | 0.350 | 180.000 | 4.000 | same as X -c -na-X |
| CM-CB-CB-NA | 1 | 6.650 | 180.000 | 2.000 | same as X -c2-c2-X |
| CM-CB-CB-NC | 1 | 4.000 | 180.000 | 2.000 | same as X -cc-cc-X |
| H4-CM-N*-C  | 1 | 0.625 | 180.000 | 2.000 | same as X -c2-na-X |
| H4-CM-CB-CB | 1 | 4.000 | 180.000 | 2.000 | same as X -cc-cc-X |
| CB-C*-CC-NA | 1 | 6.650 | 180.000 | 2.000 | same as X -c2-c2-X |
| CB-CM-N*-C  | 1 | 0.625 | 180.000 | 2.000 | same as X -c2-na-X |
| CB-CB-NA-H  | 1 | 0.625 | 180.000 | 2.000 | same as X -c2-na-X |
| CB-CB-NC-C  | 1 | 4.150 | 180.000 | 2.000 | same as X -c2-n2-X |
| CB-NC-C -O  | 1 | 4.150 | 180.000 | 2.000 | same as X -c -n2-X |
| NA-CB-NC-C  | 1 | 4.150 | 180.000 | 2.000 | same as X -c2-n2-X |
| H -NA-CB-NC | 1 | 0.625 | 180.000 | 2.000 | same as X -c2-na-X |
| C -N*-CT-OS | 1 | 0.000 | 0.000   | 2.000 | same as X -c3-na-X |
| C -N*-CT-CT | 1 | 0.000 | 0.000   | 2.000 | same as X -c3-na-X |
| OS-CT-CT-CT | 1 | 0.156 | 0.000   | 3.000 | same as X -c3-c3-X |
| OS-CT-CT-HC | 1 | 0.156 | 0.000   | 3.000 | same as X -c3-c3-X |
| OS-CT-CT-H1 | 1 | 0.156 | 0.000   | 3.000 | same as X -c3-c3-X |
| OS-CT-CT-OS | 1 | 0.156 | 0.000   | 3.000 | same as X -c3-c3-X |
| OS-CT-CT-OH | 1 | 0.156 | 0.000   | 3.000 | same as X -c3-c3-X |
| CT-CT-OS-P  | 1 | 0.383 | 0.000   | 3.000 | same as X -c3-os-X |
| CT-CT-OH-HO | 1 | 0.167 | 0.000   | 3.000 | same as X -c3-oh-X |
| CT-CT-CT-HC | 1 | 0.156 | 0.000   | 3.000 | same as X -c3-c3-X |
| H1-CT-CT-H1 | 1 | 0.156 | 0.000   | 3.000 | same as X -c3-c3-X |
| H1-CT-CT-OH | 1 | 0.156 | 0.000   | 3.000 | same as X -c3-c3-X |
| CT-OS-P -O2 | 1 | 1.050 | 180.000 | 2.000 | same as X -os-p4-X |
| CT-OS-P -OH | 1 | 1.050 | 180.000 | 2.000 | same as X -os-p4-X |
| H1-CT-OS-P  | 1 | 0.383 | 0.000   | 3.000 | same as X -c3-os-X |
| OS-P -OH-HO | 1 | 0.700 | 0.000   | 1.000 | same as X -oh-p4-X |
| O2-P -OH-HO | 1 | 0.700 | 0.000   | 1.000 | same as X -oh-p4-X |
| H1-CT-OH-HO | 1 | 0.167 | 0.000   | 3.000 | same as X -c3-oh-X |
| H1-CT-CT-HC | 1 | 0.156 | 0.000   | 3.000 | same as X -c3-c3-X |
| OH-CT-CT-HC | 1 | 0.156 | 0.000   | 3.000 | same as X -c3-c3-X |

#### IMPROPER

|             |     |       |     |                     |
|-------------|-----|-------|-----|---------------------|
| CB-CC-C*-HA | 1.1 | 180.0 | 2.0 | Using default value |
| C*-CT-CC-NA | 1.1 | 180.0 | 2.0 | Using default value |
| C -CM-N*-CT | 1.1 | 180.0 | 2.0 | Using default value |
| CB-H4-CM-N* | 1.1 | 180.0 | 2.0 | Using default value |
| C*-CB-CB-CM | 1.1 | 180.0 | 2.0 | Using default value |
| CB-NA-CB-NC | 1.1 | 180.0 | 2.0 | Using default value |
| CB-CC-NA-H  | 1.1 | 180.0 | 2.0 | Using default value |
| N*-NC-C -O  | 1.1 | 180.0 | 2.0 | Using default value |

#### NONBON

|    |        |        |            |
|----|--------|--------|------------|
| C* | 1.9080 | 0.0860 | same as cc |
| HA | 1.4870 | 0.0157 | same as hc |
| CC | 1.9080 | 0.0860 | same as cc |
| CT | 1.9080 | 0.1094 | same as c3 |
| HC | 1.4870 | 0.0157 | same as hc |
| H2 | 1.4870 | 0.0157 | same as hc |
| N* | 1.8240 | 0.1700 | same as na |
| CM | 1.9080 | 0.0860 | same as cc |
| H4 | 1.4870 | 0.0157 | same as hc |
| CB | 1.9080 | 0.0860 | same as cc |
| NA | 1.8240 | 0.1700 | same as na |
| H  | 0.6000 | 0.0157 | same as hn |
| NC | 1.8240 | 0.1700 | same as nc |
| C  | 1.9080 | 0.0860 | same as c  |
| O  | 1.6612 | 0.2100 | same as o  |
| OS | 1.6837 | 0.1700 | same as os |
| H1 | 1.4870 | 0.0157 | same as hc |
| P  | 2.1000 | 0.2000 | same as p4 |
| O2 | 1.6612 | 0.2100 | same as o  |
| OH | 1.7210 | 0.2104 | same as oh |
| HO | 0.0000 | 0.0000 | same as ho |

<END OF .frcmod FILE. DO NOT INCLUDE THE LINES WITH <>, INCLUDING THIS ONE>

<BELOW IS THE AMBER .lib FILE FOR DNA CONTAINING PdC>

```
!!index array str
"PdC"
!entry.PdC.unit.atoms table str name str type int typex int resx int flags int
seq int elmnt dbl chg
"C9" "C*" 0 1 131072 1 6 -0.080300
"H9" "HA" 0 1 131072 2 1 0.233800
"C8" "CC" 0 1 131072 3 6 0.198900
"CM" "CT" 0 1 131072 4 6 -0.126100
"HM1" "HC" 0 1 131072 5 1 0.134200
"HM2" "HC" 0 1 131072 6 1 0.136300
"HM3" "HC" 0 1 131072 7 1 0.106800
"C1'" "CT" 0 1 131072 8 6 0.298200
"H1'" "H2" 0 1 131072 9 1 0.114300
"N3" "N*" 0 1 131072 10 7 -0.285000
"C4" "CM" 0 1 131072 11 6 0.009200
"H4" "H4" 0 1 131072 12 1 0.290300
"C5" "CB" 0 1 131072 13 6 -0.074300
"C6" "CB" 0 1 131072 14 6 0.017600
"N7" "NA" 0 1 131072 15 7 -0.146100
"H7" "H" 0 1 131072 16 1 0.364200
"N1" "NC" 0 1 131072 17 7 -0.199800
"C2" "C" 0 1 131072 18 6 0.766900
"O2" "O" 0 1 131072 19 8 -0.414900
"O4'" "OS" 0 1 131072 20 8 -0.396000
"C4'" "CT" 0 1 131072 21 6 0.072900
"H4'" "H1" 0 1 131072 22 1 0.104800
"C5'" "CT" 0 1 131072 23 6 0.167600
"H5'2" "H1" 0 1 131072 24 1 0.070700
"H5'1" "H1" 0 1 131072 25 1 0.077300
"O5'" "OS" 0 1 131072 26 8 -0.596700
"P" "P" 0 1 131072 27 15 1.507300
"O2P" "O2" 0 1 131072 28 8 -0.509500
"O1P" "O2" 0 1 131072 29 8 -0.739200
"C3'" "CT" 0 1 131072 30 6 0.112400
"H3'" "H1" 0 1 131072 31 1 0.150100
"O3'" "OS" 0 1 131072 32 8 -0.565500
"C2'" "CT" 0 1 131072 33 6 -0.145400
"H2'2" "HC" 0 1 131072 34 1 0.096400
"H2'1" "HC" 0 1 131072 35 1 0.093300
!entry.PdC.unit.atoms pertinfo table str pname str ptype int ptypex int pelmnt dbl
pchg
"C9" "C*" 0 -1 0.0
"H9" "HA" 0 -1 0.0
"C8" "CC" 0 -1 0.0
"CM" "CT" 0 -1 0.0
"HM1" "HC" 0 -1 0.0
"HM2" "HC" 0 -1 0.0
"HM3" "HC" 0 -1 0.0
"C1'" "CT" 0 -1 0.0
"H1'" "H2" 0 -1 0.0
"N3" "N*" 0 -1 0.0
"C4" "CM" 0 -1 0.0
"H4" "H4" 0 -1 0.0
"C5" "CB" 0 -1 0.0
"C6" "CB" 0 -1 0.0
"N7" "NA" 0 -1 0.0
"H7" "H" 0 -1 0.0
"N1" "NC" 0 -1 0.0
"C2" "C" 0 -1 0.0
"O2" "O" 0 -1 0.0
"O4'" "OS" 0 -1 0.0
"C4'" "CT" 0 -1 0.0
"H4'" "H1" 0 -1 0.0
"C5'" "CT" 0 -1 0.0
"H5'2" "H1" 0 -1 0.0
"H5'1" "H1" 0 -1 0.0
"O5'" "OS" 0 -1 0.0
"P" "P" 0 -1 0.0
"O2P" "O2" 0 -1 0.0
"O1P" "O2" 0 -1 0.0
```

```

"C3'" "CT" 0 -1 0.0
"H3'" "H1" 0 -1 0.0
"O3'" "OS" 0 -1 0.0
"C2'" "CT" 0 -1 0.0
"H2'2" "HC" 0 -1 0.0
"H2'1" "HC" 0 -1 0.0
!entry.PDC.unit.boundbox array dbl
-1.000000
0.0
0.0
0.0
0.0
!entry.PDC.unit.childsequence single int
2
!entry.PDC.unit.connect array int
27
32
!entry.PDC.unit.connectivity table int atom1x int atom2x int flags
1 2 1
1 3 2
1 13 1
3 4 1
3 15 1
4 5 1
4 6 1
4 7 1
8 9 1
8 10 1
8 20 1
8 33 1
10 11 1
10 18 4
11 12 1
11 13 2
13 14 1
14 15 1
14 17 2
15 16 1
17 18 1
18 19 2
20 21 1
21 22 1
21 23 1
21 30 1
23 24 1
23 25 1
23 26 1
26 27 1
27 28 1
27 29 1
30 31 1
30 32 1
30 33 1
33 34 1
33 35 1
!entry.PDC.unit.hierarchy table str abovetype int abovex str belowtype int belowx
"U" 0 "R" 1
"R" 1 "A" 1
"R" 1 "A" 2
"R" 1 "A" 3
"R" 1 "A" 4
"R" 1 "A" 5
"R" 1 "A" 6
"R" 1 "A" 7
"R" 1 "A" 8
"R" 1 "A" 9
"R" 1 "A" 10
"R" 1 "A" 11
"R" 1 "A" 12
"R" 1 "A" 13
"R" 1 "A" 14
"R" 1 "A" 15

```

```

"R" 1 "A" 16
"R" 1 "A" 17
"R" 1 "A" 18
"R" 1 "A" 19
"R" 1 "A" 20
"R" 1 "A" 21
"R" 1 "A" 22
"R" 1 "A" 23
"R" 1 "A" 24
"R" 1 "A" 25
"R" 1 "A" 26
"R" 1 "A" 27
"R" 1 "A" 28
"R" 1 "A" 29
"R" 1 "A" 30
"R" 1 "A" 31
"R" 1 "A" 32
"R" 1 "A" 33
"R" 1 "A" 34
"R" 1 "A" 35
!entry.PDC.unit.name single str
"PDC"
!entry.PDC.unit.positions table  dbl x  dbl y  dbl z
4.466000 -1.891000 -8.681000
5.115000 -1.251000 -8.075000
3.279000 -1.557000 -9.215000
2.598000 -0.216000 -9.075000
1.672000 -0.330000 -8.492000
3.263000 0.487000 -8.553000
2.343000 0.198000 -10.061000
6.698000 -6.249000 -8.889000
6.478000 -7.283000 -9.207000
5.639000 -5.299000 -9.258000
5.690000 -4.025000 -8.772000
6.518000 -3.670000 -8.168000
4.702000 -3.158000 -9.010000
3.571000 -3.575000 -9.808000
2.720000 -2.560000 -9.926000
1.871000 -2.537000 -10.439000
3.496000 -4.745000 -10.288000
4.575000 -5.674000 -10.022000
4.456000 -6.779000 -10.528000
6.802000 -6.213000 -7.458000
8.048000 -6.814000 -7.065000
7.866000 -7.860000 -6.757000
8.634000 -5.994000 -5.901000
9.545000 -6.482000 -5.524000
7.906000 -5.915000 -5.079000
8.961000 -4.701000 -6.420000
9.614000 -3.596000 -5.476000
9.787000 -2.305000 -6.199000
10.925000 -4.076000 -4.959000
8.976000 -6.730000 -8.306000
9.965000 -6.279000 -8.115000
9.228000 -8.073000 -8.737000
8.145000 -5.883000 -9.293000
8.356000 -4.823000 -9.101000
8.397000 -6.098000 -10.331000
!entry.PDC.unit.residueconnect table  int c1x  int c2x  int c3x  int c4x  int c5x  int
c6x
27 32 0 0 0 0
!entry.PDC.unit.residues table  str name  int seq  int childseq  int startatomx  str
restype  int imagingx
"PDC" 1 36 1 "n" 0
!entry.PDC.unit.residuesPdbSequenceNumber array int
0
!entry.PDC.unit.solventcap array dbl
-1.000000
0.0
0.0
0.0
0.0

```



<BELOW IS THE PDB FILE FOR THE 6PdC HAIRPIN>

REMARK

|      |    |      |     |   |        |        |        |
|------|----|------|-----|---|--------|--------|--------|
| ATOM | 1  | H5T  | DA5 | 1 | 11.166 | -0.403 | 14.164 |
| ATOM | 2  | O5'  | DA5 | 1 | 10.698 | -0.960 | 13.512 |
| ATOM | 3  | C5'  | DA5 | 1 | 10.404 | -2.289 | 14.012 |
| ATOM | 4  | H5'1 | DA5 | 1 | 9.823  | -2.195 | 14.939 |
| ATOM | 5  | H5'2 | DA5 | 1 | 11.324 | -2.752 | 14.308 |
| ATOM | 6  | C4'  | DA5 | 1 | 9.649  | -3.226 | 13.032 |
| ATOM | 7  | H4'  | DA5 | 1 | 9.453  | -4.157 | 13.591 |
| ATOM | 8  | O4'  | DA5 | 1 | 8.405  | -2.618 | 12.552 |
| ATOM | 9  | C1'  | DA5 | 1 | 8.414  | -2.323 | 11.149 |
| ATOM | 10 | H1'  | DA5 | 1 | 7.853  | -3.079 | 10.636 |
| ATOM | 11 | N9   | DA5 | 1 | 7.826  | -0.991 | 10.937 |
| ATOM | 12 | C8   | DA5 | 1 | 8.367  | 0.237  | 11.298 |
| ATOM | 13 | H8   | DA5 | 1 | 9.328  | 0.315  | 11.756 |
| ATOM | 14 | N7   | DA5 | 1 | 7.597  | 1.256  | 10.996 |
| ATOM | 15 | C5   | DA5 | 1 | 6.451  | 0.658  | 10.414 |
| ATOM | 16 | C6   | DA5 | 1 | 5.207  | 1.152  | 9.945  |
| ATOM | 17 | N6   | DA5 | 1 | 4.894  | 2.439  | 9.933  |
| ATOM | 18 | H61  | DA5 | 1 | 3.987  | 2.708  | 9.515  |
| ATOM | 19 | H62  | DA5 | 1 | 5.542  | 3.090  | 10.367 |
| ATOM | 20 | N1   | DA5 | 1 | 4.284  | 0.340  | 9.411  |
| ATOM | 21 | C2   | DA5 | 1 | 4.498  | -0.950 | 9.487  |
| ATOM | 22 | H2   | DA5 | 1 | 3.718  | -1.603 | 9.083  |
| ATOM | 23 | N3   | DA5 | 1 | 5.585  | -1.576 | 9.968  |
| ATOM | 24 | C4   | DA5 | 1 | 6.562  | -0.725 | 10.459 |
| ATOM | 25 | C3'  | DA5 | 1 | 10.417 | -3.539 | 11.721 |
| ATOM | 26 | H3'  | DA5 | 1 | 11.494 | -3.444 | 11.852 |
| ATOM | 27 | C2'  | DA5 | 1 | 9.871  | -2.531 | 10.708 |
| ATOM | 28 | H2'1 | DA5 | 1 | 10.427 | -1.564 | 10.785 |
| ATOM | 29 | H2'2 | DA5 | 1 | 9.944  | -2.853 | 9.693  |
| ATOM | 30 | O3'  | DA5 | 1 | 10.162 | -4.921 | 11.283 |
| ATOM | 31 | P    | DT  | 2 | 10.872 | -5.486 | 9.897  |
| ATOM | 32 | O1P  | DT  | 2 | 11.173 | -6.972 | 10.038 |
| ATOM | 33 | O2P  | DT  | 2 | 12.093 | -4.704 | 9.439  |
| ATOM | 34 | O5'  | DT  | 2 | 9.680  | -5.266 | 8.802  |
| ATOM | 35 | C5'  | DT  | 2 | 8.498  | -6.046 | 8.971  |
| ATOM | 36 | H5'1 | DT  | 2 | 8.155  | -5.936 | 9.983  |
| ATOM | 37 | H5'2 | DT  | 2 | 8.709  | -7.109 | 8.796  |
| ATOM | 38 | C4'  | DT  | 2 | 7.403  | -5.617 | 7.970  |
| ATOM | 39 | H4'  | DT  | 2 | 6.480  | -6.154 | 8.224  |
| ATOM | 40 | O4'  | DT  | 2 | 7.169  | -4.204 | 8.124  |
| ATOM | 41 | C1'  | DT  | 2 | 6.589  | -3.653 | 6.914  |
| ATOM | 42 | H1'  | DT  | 2 | 5.524  | -3.883 | 6.867  |
| ATOM | 43 | N1   | DT  | 2 | 6.869  | -2.180 | 6.833  |
| ATOM | 44 | C6   | DT  | 2 | 8.131  | -1.674 | 7.206  |
| ATOM | 45 | H6   | DT  | 2 | 8.826  | -2.436 | 7.459  |
| ATOM | 46 | C5   | DT  | 2 | 8.366  | -0.317 | 7.262  |
| ATOM | 47 | C7   | DT  | 2 | 9.673  | 0.263  | 7.775  |
| ATOM | 48 | H71  | DT  | 2 | 10.152 | 0.819  | 6.984  |
| ATOM | 49 | H72  | DT  | 2 | 9.491  | 0.952  | 8.579  |
| ATOM | 50 | H73  | DT  | 2 | 10.379 | -0.556 | 8.063  |
| ATOM | 51 | C4   | DT  | 2 | 7.293  | 0.614  | 6.954  |
| ATOM | 52 | O4   | DT  | 2 | 7.348  | 1.820  | 6.930  |
| ATOM | 53 | N3   | DT  | 2 | 6.075  | 0.026  | 6.607  |
| ATOM | 54 | H3   | DT  | 2 | 5.296  | 0.650  | 6.419  |
| ATOM | 55 | C2   | DT  | 2 | 5.822  | -1.323 | 6.450  |
| ATOM | 56 | O2   | DT  | 2 | 4.758  | -1.660 | 5.990  |
| ATOM | 57 | C3'  | DT  | 2 | 7.789  | -5.792 | 6.496  |
| ATOM | 58 | H3'  | DT  | 2 | 8.855  | -5.939 | 6.359  |
| ATOM | 59 | C2'  | DT  | 2 | 7.300  | -4.464 | 5.821  |
| ATOM | 60 | H2'1 | DT  | 2 | 8.175  | -3.868 | 5.545  |
| ATOM | 61 | H2'2 | DT  | 2 | 6.624  | -4.556 | 4.960  |
| ATOM | 62 | O3'  | DT  | 2 | 7.031  | -6.943 | 6.009  |
| ATOM | 63 | P    | DA  | 3 | 7.371  | -7.605 | 4.548  |
| ATOM | 64 | O1P  | DA  | 3 | 7.116  | -9.089 | 4.570  |
| ATOM | 65 | O2P  | DA  | 3 | 8.779  | -7.302 | 4.097  |
| ATOM | 66 | O5'  | DA  | 3 | 6.262  | -6.755 | 3.663  |
| ATOM | 67 | C5'  | DA  | 3 | 4.839  | -6.884 | 3.946  |
| ATOM | 68 | H5'1 | DA  | 3 | 4.667  | -6.574 | 5.024  |
| ATOM | 69 | H5'2 | DA  | 3 | 4.444  | -7.890 | 3.871  |

|      |     |      |    |   |        |        |        |
|------|-----|------|----|---|--------|--------|--------|
| ATOM | 70  | C4'  | DA | 3 | 3.975  | -5.956 | 3.055  |
| ATOM | 71  | H4'  | DA | 3 | 2.972  | -6.112 | 3.328  |
| ATOM | 72  | O4'  | DA | 3 | 4.300  | -4.595 | 3.405  |
| ATOM | 73  | C1'  | DA | 3 | 4.558  | -3.788 | 2.248  |
| ATOM | 74  | H1'  | DA | 3 | 3.632  | -3.307 | 1.883  |
| ATOM | 75  | N9   | DA | 3 | 5.544  | -2.759 | 2.593  |
| ATOM | 76  | C8   | DA | 3 | 6.884  | -2.945 | 2.896  |
| ATOM | 77  | H8   | DA | 3 | 7.304  | -3.943 | 2.831  |
| ATOM | 78  | N7   | DA | 3 | 7.602  | -1.892 | 3.212  |
| ATOM | 79  | C5   | DA | 3 | 6.660  | -0.832 | 3.100  |
| ATOM | 80  | C6   | DA | 3 | 6.741  | 0.550  | 3.293  |
| ATOM | 81  | N6   | DA | 3 | 7.789  | 1.277  | 3.634  |
| ATOM | 82  | H61  | DA | 3 | 7.658  | 2.296  | 3.688  |
| ATOM | 83  | H62  | DA | 3 | 8.674  | 0.854  | 3.865  |
| ATOM | 84  | N1   | DA | 3 | 5.646  | 1.282  | 3.078  |
| ATOM | 85  | C2   | DA | 3 | 4.527  | 0.740  | 2.666  |
| ATOM | 86  | H2   | DA | 3 | 3.675  | 1.380  | 2.497  |
| ATOM | 87  | N3   | DA | 3 | 4.299  | -0.563 | 2.491  |
| ATOM | 88  | C4   | DA | 3 | 5.402  | -1.374 | 2.683  |
| ATOM | 89  | C3'  | DA | 3 | 4.157  | -6.099 | 1.529  |
| ATOM | 90  | H3'  | DA | 3 | 4.600  | -7.022 | 1.187  |
| ATOM | 91  | C2'  | DA | 3 | 5.016  | -4.855 | 1.202  |
| ATOM | 92  | H2'1 | DA | 3 | 6.063  | -5.160 | 1.367  |
| ATOM | 93  | H2'2 | DA | 3 | 4.896  | -4.497 | 0.164  |
| ATOM | 94  | O3'  | DA | 3 | 2.854  | -6.025 | 0.852  |
| ATOM | 95  | P    | DT | 4 | 2.641  | -6.107 | -0.789 |
| ATOM | 96  | O1P  | DT | 4 | 1.360  | -6.788 | -1.136 |
| ATOM | 97  | O2P  | DT | 4 | 3.780  | -6.754 | -1.503 |
| ATOM | 98  | O5'  | DT | 4 | 2.547  | -4.513 | -1.109 |
| ATOM | 99  | C5'  | DT | 4 | 1.284  | -3.865 | -0.770 |
| ATOM | 100 | H5'1 | DT | 4 | 1.035  | -4.021 | 0.278  |
| ATOM | 101 | H5'2 | DT | 4 | 0.421  | -4.277 | -1.317 |
| ATOM | 102 | C4'  | DT | 4 | 1.314  | -2.361 | -1.085 |
| ATOM | 103 | H4'  | DT | 4 | 0.422  | -1.834 | -0.693 |
| ATOM | 104 | O4'  | DT | 4 | 2.501  | -1.786 | -0.505 |
| ATOM | 105 | C1'  | DT | 4 | 2.982  | -0.658 | -1.308 |
| ATOM | 106 | H1'  | DT | 4 | 2.456  | 0.232  | -0.925 |
| ATOM | 107 | N1   | DT | 4 | 4.402  | -0.421 | -1.130 |
| ATOM | 108 | C6   | DT | 4 | 5.260  | -1.540 | -1.059 |
| ATOM | 109 | H6   | DT | 4 | 4.810  | -2.484 | -1.328 |
| ATOM | 110 | C5   | DT | 4 | 6.571  | -1.415 | -0.736 |
| ATOM | 111 | C7   | DT | 4 | 7.507  | -2.647 | -0.750 |
| ATOM | 112 | H71  | DT | 4 | 8.338  | -2.461 | -1.435 |
| ATOM | 113 | H72  | DT | 4 | 7.906  | -2.833 | 0.234  |
| ATOM | 114 | H73  | DT | 4 | 6.964  | -3.584 | -0.973 |
| ATOM | 115 | C4   | DT | 4 | 7.096  | -0.087 | -0.357 |
| ATOM | 116 | O4   | DT | 4 | 8.212  | 0.140  | 0.044  |
| ATOM | 117 | N3   | DT | 4 | 6.226  | 0.951  | -0.553 |
| ATOM | 118 | H3   | DT | 4 | 6.603  | 1.841  | -0.351 |
| ATOM | 119 | C2   | DT | 4 | 4.857  | 0.878  | -0.844 |
| ATOM | 120 | O2   | DT | 4 | 4.228  | 1.906  | -0.939 |
| ATOM | 121 | C3'  | DT | 4 | 1.407  | -2.063 | -2.603 |
| ATOM | 122 | H3'  | DT | 4 | 1.739  | -2.942 | -3.153 |
| ATOM | 123 | C2'  | DT | 4 | 2.519  | -0.968 | -2.715 |
| ATOM | 124 | H2'1 | DT | 4 | 3.305  | -1.380 | -3.297 |
| ATOM | 125 | H2'2 | DT | 4 | 2.153  | -0.012 | -3.125 |
| ATOM | 126 | O3'  | DT | 4 | 0.114  | -1.555 | -3.060 |
| ATOM | 127 | P    | DA | 5 | -0.183 | -1.325 | -4.652 |
| ATOM | 128 | O1P  | DA | 5 | -1.663 | -1.441 | -4.942 |
| ATOM | 129 | O2P  | DA | 5 | 0.530  | -2.340 | -5.529 |
| ATOM | 130 | O5'  | DA | 5 | 0.395  | 0.179  | -4.919 |
| ATOM | 131 | C5'  | DA | 5 | -0.409 | 1.299  | -4.419 |
| ATOM | 132 | H5'1 | DA | 5 | -0.611 | 1.170  | -3.373 |
| ATOM | 133 | H5'2 | DA | 5 | -1.343 | 1.283  | -5.000 |
| ATOM | 134 | C4'  | DA | 5 | 0.359  | 2.606  | -4.625 |
| ATOM | 135 | H4'  | DA | 5 | -0.178 | 3.410  | -4.128 |
| ATOM | 136 | O4'  | DA | 5 | 1.701  | 2.472  | -4.023 |
| ATOM | 137 | C1'  | DA | 5 | 2.699  | 3.075  | -4.906 |
| ATOM | 138 | H1'  | DA | 5 | 2.787  | 4.150  | -4.670 |
| ATOM | 139 | N9   | DA | 5 | 3.945  | 2.409  | -4.706 |
| ATOM | 140 | C8   | DA | 5 | 4.229  | 1.068  | -4.892 |
| ATOM | 141 | H8   | DA | 5 | 3.527  | 0.372  | -5.306 |

|      |     |      |     |   |        |        |         |
|------|-----|------|-----|---|--------|--------|---------|
| ATOM | 142 | N7   | DA  | 5 | 5.442  | 0.649  | -4.654  |
| ATOM | 143 | C5   | DA  | 5 | 6.038  | 1.821  | -4.156  |
| ATOM | 144 | C6   | DA  | 5 | 7.313  | 2.152  | -3.658  |
| ATOM | 145 | N6   | DA  | 5 | 8.298  | 1.308  | -3.421  |
| ATOM | 146 | H61  | DA  | 5 | 9.106  | 1.628  | -2.907  |
| ATOM | 147 | H62  | DA  | 5 | 8.188  | 0.350  | -3.614  |
| ATOM | 148 | N1   | DA  | 5 | 7.603  | 3.420  | -3.286  |
| ATOM | 149 | C2   | DA  | 5 | 6.668  | 4.342  | -3.436  |
| ATOM | 150 | H2   | DA  | 5 | 6.965  | 5.365  | -3.146  |
| ATOM | 151 | N3   | DA  | 5 | 5.451  | 4.198  | -3.890  |
| ATOM | 152 | C4   | DA  | 5 | 5.137  | 2.903  | -4.261  |
| ATOM | 153 | C3'  | DA  | 5 | 0.581  | 2.994  | -6.072  |
| ATOM | 154 | H3'  | DA  | 5 | 0.033  | 2.349  | -6.767  |
| ATOM | 155 | C2'  | DA  | 5 | 2.096  | 2.873  | -6.302  |
| ATOM | 156 | H2'1 | DA  | 5 | 2.352  | 1.879  | -6.682  |
| ATOM | 157 | H2'2 | DA  | 5 | 2.471  | 3.609  | -7.012  |
| ATOM | 158 | O3'  | DA  | 5 | 0.104  | 4.385  | -6.137  |
| ATOM | 159 | C9   | PDC | 6 | 5.798  | 2.248  | -8.062  |
| ATOM | 160 | H9   | PDC | 6 | 4.880  | 1.886  | -8.557  |
| ATOM | 161 | C8   | PDC | 6 | 7.008  | 1.494  | -7.731  |
| ATOM | 162 | CM   | PDC | 6 | 7.146  | 0.017  | -8.002  |
| ATOM | 163 | HM1  | PDC | 6 | 6.132  | -0.400 | -8.069  |
| ATOM | 164 | HM2  | PDC | 6 | 7.627  | -0.476 | -7.144  |
| ATOM | 165 | HM3  | PDC | 6 | 7.673  | -0.226 | -8.907  |
| ATOM | 166 | C1'  | PDC | 6 | 4.968  | 7.129  | -6.984  |
| ATOM | 167 | H1'  | PDC | 6 | 5.488  | 7.981  | -6.470  |
| ATOM | 168 | N3   | PDC | 6 | 5.794  | 5.907  | -7.011  |
| ATOM | 169 | C4   | PDC | 6 | 5.234  | 4.730  | -7.568  |
| ATOM | 170 | H4   | PDC | 6 | 4.242  | 4.770  | -7.960  |
| ATOM | 171 | C5   | PDC | 6 | 6.070  | 3.567  | -7.582  |
| ATOM | 172 | C6   | PDC | 6 | 7.374  | 3.548  | -7.002  |
| ATOM | 173 | N7   | PDC | 6 | 7.968  | 2.296  | -7.082  |
| ATOM | 174 | H7   | PDC | 6 | 8.834  | 1.989  | -6.640  |
| ATOM | 175 | N1   | PDC | 6 | 7.790  | 4.691  | -6.365  |
| ATOM | 176 | C2   | PDC | 6 | 7.034  | 5.883  | -6.362  |
| ATOM | 177 | O2   | PDC | 6 | 7.516  | 6.872  | -5.818  |
| ATOM | 178 | O4'  | PDC | 6 | 3.761  | 6.914  | -6.213  |
| ATOM | 179 | C4'  | PDC | 6 | 2.787  | 7.916  | -6.596  |
| ATOM | 180 | H4'  | PDC | 6 | 2.804  | 8.671  | -5.800  |
| ATOM | 181 | C5'  | PDC | 6 | 1.398  | 7.262  | -6.729  |
| ATOM | 182 | H5'2 | PDC | 6 | 0.669  | 7.940  | -7.157  |
| ATOM | 183 | H5'1 | PDC | 6 | 1.067  | 7.033  | -5.683  |
| ATOM | 184 | O5'  | PDC | 6 | 1.449  | 6.048  | -7.543  |
| ATOM | 185 | P    | PDC | 6 | 0.059  | 5.144  | -7.591  |
| ATOM | 186 | O2P  | PDC | 6 | 0.127  | 4.247  | -8.789  |
| ATOM | 187 | O1P  | PDC | 6 | -1.108 | 6.080  | -7.621  |
| ATOM | 188 | C3'  | PDC | 6 | 3.329  | 8.574  | -7.902  |
| ATOM | 189 | H3'  | PDC | 6 | 2.529  | 8.658  | -8.633  |
| ATOM | 190 | O3'  | PDC | 6 | 3.878  | 9.899  | -7.586  |
| ATOM | 191 | C2'  | PDC | 6 | 4.447  | 7.653  | -8.327  |
| ATOM | 192 | H2'2 | PDC | 6 | 4.093  | 6.859  | -8.984  |
| ATOM | 193 | H2'1 | PDC | 6 | 5.216  | 8.156  | -8.856  |
| ATOM | 194 | P    | DC  | 7 | 4.369  | 10.936 | -8.765  |
| ATOM | 195 | O1P  | DC  | 7 | 4.096  | 12.338 | -8.292  |
| ATOM | 196 | O2P  | DC  | 7 | 3.639  | 10.576 | -10.029 |
| ATOM | 197 | O5'  | DC  | 7 | 5.959  | 10.571 | -8.845  |
| ATOM | 198 | C5'  | DC  | 7 | 6.789  | 10.884 | -7.692  |
| ATOM | 199 | H5'1 | DC  | 7 | 6.252  | 10.542 | -6.820  |
| ATOM | 200 | H5'2 | DC  | 7 | 6.925  | 11.982 | -7.658  |
| ATOM | 201 | C4'  | DC  | 7 | 8.191  | 10.242 | -7.861  |
| ATOM | 202 | H4'  | DC  | 7 | 8.711  | 10.379 | -6.915  |
| ATOM | 203 | O4'  | DC  | 7 | 7.943  | 8.818  | -8.112  |
| ATOM | 204 | C1'  | DC  | 7 | 8.752  | 8.373  | -9.204  |
| ATOM | 205 | H1'  | DC  | 7 | 9.757  | 8.235  | -8.851  |
| ATOM | 206 | N1   | DC  | 7 | 8.210  | 7.105  | -9.751  |
| ATOM | 207 | C6   | DC  | 7 | 7.074  | 7.085  | -10.598 |
| ATOM | 208 | H6   | DC  | 7 | 6.529  | 8.030  | -10.732 |
| ATOM | 209 | C5   | DC  | 7 | 6.563  | 5.907  | -11.069 |
| ATOM | 210 | H5   | DC  | 7 | 5.633  | 5.918  | -11.613 |
| ATOM | 211 | C4   | DC  | 7 | 7.303  | 4.743  | -10.775 |
| ATOM | 212 | N4   | DC  | 7 | 6.907  | 3.567  | -11.164 |
| ATOM | 213 | H41  | DC  | 7 | 7.510  | 2.810  | -10.896 |

|      |     |      |    |    |        |        |         |
|------|-----|------|----|----|--------|--------|---------|
| ATOM | 214 | H42  | DC | 7  | 6.072  | 3.437  | -11.729 |
| ATOM | 215 | N3   | DC | 7  | 8.285  | 4.678  | -9.891  |
| ATOM | 216 | C2   | DC | 7  | 8.789  | 5.904  | -9.354  |
| ATOM | 217 | O2   | DC | 7  | 9.695  | 5.825  | -8.533  |
| ATOM | 218 | C3'  | DC | 7  | 8.986  | 10.734 | -9.129  |
| ATOM | 219 | H3'  | DC | 7  | 8.623  | 11.689 | -9.470  |
| ATOM | 220 | C2'  | DC | 7  | 8.748  | 9.576  | -10.119 |
| ATOM | 221 | H2'1 | DC | 7  | 7.759  | 9.795  | -10.564 |
| ATOM | 222 | H2'2 | DC | 7  | 9.477  | 9.469  | -10.926 |
| ATOM | 223 | O3'  | DC | 7  | 10.424 | 10.817 | -8.785  |
| ATOM | 224 | P    | DC | 8  | 11.441 | 11.463 | -9.868  |
| ATOM | 225 | O1P  | DC | 8  | 12.576 | 12.200 | -9.226  |
| ATOM | 226 | O2P  | DC | 8  | 10.698 | 12.430 | -10.748 |
| ATOM | 227 | O5'  | DC | 8  | 11.914 | 10.080 | -10.606 |
| ATOM | 228 | C5'  | DC | 8  | 12.689 | 9.084  | -9.852  |
| ATOM | 229 | H5'1 | DC | 8  | 12.224 | 8.991  | -8.894  |
| ATOM | 230 | H5'2 | DC | 8  | 13.728 | 9.472  | -9.724  |
| ATOM | 231 | C4'  | DC | 8  | 12.698 | 7.644  | -10.404 |
| ATOM | 232 | H4'  | DC | 8  | 13.159 | 7.002  | -9.637  |
| ATOM | 233 | O4'  | DC | 8  | 11.357 | 7.142  | -10.662 |
| ATOM | 234 | C1'  | DC | 8  | 11.423 | 6.089  | -11.660 |
| ATOM | 235 | H1'  | DC | 8  | 11.251 | 5.147  | -11.126 |
| ATOM | 236 | N1   | DC | 8  | 10.359 | 6.290  | -12.683 |
| ATOM | 237 | C6   | DC | 8  | 10.051 | 7.619  | -13.062 |
| ATOM | 238 | H6   | DC | 8  | 10.711 | 8.369  | -12.677 |
| ATOM | 239 | C5   | DC | 8  | 9.005  | 7.837  | -13.899 |
| ATOM | 240 | H5   | DC | 8  | 8.782  | 8.866  | -14.175 |
| ATOM | 241 | C4   | DC | 8  | 8.233  | 6.700  | -14.319 |
| ATOM | 242 | N4   | DC | 8  | 7.141  | 6.878  | -14.993 |
| ATOM | 243 | H41  | DC | 8  | 6.678  | 6.036  | -15.315 |
| ATOM | 244 | H42  | DC | 8  | 6.947  | 7.805  | -15.361 |
| ATOM | 245 | N3   | DC | 8  | 8.546  | 5.439  | -14.046 |
| ATOM | 246 | C2   | DC | 8  | 9.709  | 5.181  | -13.295 |
| ATOM | 247 | O2   | DC | 8  | 9.977  | 4.003  | -13.022 |
| ATOM | 248 | C3'  | DC | 8  | 13.498 | 7.481  | -11.728 |
| ATOM | 249 | H3'  | DC | 8  | 13.271 | 8.281  | -12.405 |
| ATOM | 250 | C2'  | DC | 8  | 12.876 | 6.141  | -12.201 |
| ATOM | 251 | H2'1 | DC | 8  | 12.886 | 6.014  | -13.320 |
| ATOM | 252 | H2'2 | DC | 8  | 13.364 | 5.283  | -11.724 |
| ATOM | 253 | O3'  | DC | 8  | 14.931 | 7.398  | -11.395 |
| ATOM | 254 | P    | DC | 9  | 15.990 | 6.957  | -12.549 |
| ATOM | 255 | O1P  | DC | 9  | 17.388 | 7.461  | -12.242 |
| ATOM | 256 | O2P  | DC | 9  | 15.595 | 7.315  | -13.981 |
| ATOM | 257 | O5'  | DC | 9  | 15.906 | 5.370  | -12.189 |
| ATOM | 258 | C5'  | DC | 9  | 16.096 | 4.446  | -13.274 |
| ATOM | 259 | H5'1 | DC | 9  | 17.118 | 4.532  | -13.656 |
| ATOM | 260 | H5'2 | DC | 9  | 15.404 | 4.666  | -14.091 |
| ATOM | 261 | C4'  | DC | 9  | 15.722 | 3.048  | -12.727 |
| ATOM | 262 | H4'  | DC | 9  | 16.194 | 2.789  | -11.782 |
| ATOM | 263 | O4'  | DC | 9  | 14.264 | 3.042  | -12.575 |
| ATOM | 264 | C1'  | DC | 9  | 13.719 | 1.742  | -12.914 |
| ATOM | 265 | H1'  | DC | 9  | 13.337 | 1.297  | -11.960 |
| ATOM | 266 | N1   | DC | 9  | 12.612 | 1.853  | -13.867 |
| ATOM | 267 | C6   | DC | 9  | 11.516 | 0.997  | -13.690 |
| ATOM | 268 | H6   | DC | 9  | 11.561 | 0.324  | -12.835 |
| ATOM | 269 | C5   | DC | 9  | 10.476 | 0.954  | -14.556 |
| ATOM | 270 | H5   | DC | 9  | 9.654  | 0.250  | -14.430 |
| ATOM | 271 | C4   | DC | 9  | 10.512 | 1.927  | -15.610 |
| ATOM | 272 | N4   | DC | 9  | 9.560  | 2.006  | -16.507 |
| ATOM | 273 | H41  | DC | 9  | 9.600  | 2.790  | -17.156 |
| ATOM | 274 | H42  | DC | 9  | 8.732  | 1.427  | -16.413 |
| ATOM | 275 | N3   | DC | 9  | 11.514 | 2.741  | -15.854 |
| ATOM | 276 | C2   | DC | 9  | 12.650 | 2.714  | -14.979 |
| ATOM | 277 | O2   | DC | 9  | 13.612 | 3.377  | -15.352 |
| ATOM | 278 | C3'  | DC | 9  | 15.996 | 1.889  | -13.729 |
| ATOM | 279 | H3'  | DC | 9  | 15.836 | 2.228  | -14.737 |
| ATOM | 280 | C2'  | DC | 9  | 14.907 | 0.877  | -13.359 |
| ATOM | 281 | H2'1 | DC | 9  | 14.652 | 0.239  | -14.168 |
| ATOM | 282 | H2'2 | DC | 9  | 15.142 | 0.261  | -12.479 |
| ATOM | 283 | O3'  | DC | 9  | 17.370 | 1.472  | -13.687 |
| ATOM | 284 | P    | DC | 10 | 17.939 | 0.241  | -12.751 |
| ATOM | 285 | O1P  | DC | 10 | 19.388 | 0.047  | -13.106 |

|      |     |      |    |    |        |        |         |
|------|-----|------|----|----|--------|--------|---------|
| ATOM | 286 | O2P  | DC | 10 | 17.257 | -1.053 | -13.083 |
| ATOM | 287 | O5'  | DC | 10 | 17.645 | 0.819  | -11.247 |
| ATOM | 288 | C5'  | DC | 10 | 18.697 | 1.628  | -10.644 |
| ATOM | 289 | H5'1 | DC | 10 | 19.028 | 2.401  | -11.384 |
| ATOM | 290 | H5'2 | DC | 10 | 19.561 | 0.996  | -10.491 |
| ATOM | 291 | C4'  | DC | 10 | 18.316 | 2.316  | -9.312  |
| ATOM | 292 | H4'  | DC | 10 | 19.061 | 3.136  | -9.107  |
| ATOM | 293 | O4'  | DC | 10 | 17.010 | 2.936  | -9.487  |
| ATOM | 294 | C1'  | DC | 10 | 16.275 | 2.898  | -8.270  |
| ATOM | 295 | H1'  | DC | 10 | 16.568 | 3.783  | -7.633  |
| ATOM | 296 | N1   | DC | 10 | 14.835 | 2.974  | -8.594  |
| ATOM | 297 | C6   | DC | 10 | 14.162 | 1.854  | -9.128  |
| ATOM | 298 | H6   | DC | 10 | 14.808 | 1.012  | -9.378  |
| ATOM | 299 | C5   | DC | 10 | 12.824 | 1.902  | -9.326  |
| ATOM | 300 | H5   | DC | 10 | 12.292 | 1.062  | -9.720  |
| ATOM | 301 | C4   | DC | 10 | 12.139 | 3.077  | -8.957  |
| ATOM | 302 | N4   | DC | 10 | 10.859 | 3.149  | -9.062  |
| ATOM | 303 | H41  | DC | 10 | 10.437 | 4.055  | -8.808  |
| ATOM | 304 | H42  | DC | 10 | 10.326 | 2.420  | -9.477  |
| ATOM | 305 | N3   | DC | 10 | 12.705 | 4.167  | -8.487  |
| ATOM | 306 | C2   | DC | 10 | 14.116 | 4.155  | -8.337  |
| ATOM | 307 | O2   | DC | 10 | 14.645 | 5.187  | -7.933  |
| ATOM | 308 | C3'  | DC | 10 | 18.200 | 1.357  | -8.134  |
| ATOM | 309 | H3'  | DC | 10 | 18.368 | 0.307  | -8.473  |
| ATOM | 310 | C2'  | DC | 10 | 16.760 | 1.586  | -7.589  |
| ATOM | 311 | H2'1 | DC | 10 | 16.215 | 0.670  | -7.883  |
| ATOM | 312 | H2'2 | DC | 10 | 16.701 | 1.683  | -6.518  |
| ATOM | 313 | O3'  | DC | 10 | 19.239 | 1.728  | -7.174  |
| ATOM | 314 | P    | DG | 11 | 19.291 | 1.170  | -5.650  |
| ATOM | 315 | O1P  | DG | 11 | 20.748 | 1.076  | -5.278  |
| ATOM | 316 | O2P  | DG | 11 | 18.558 | -0.116 | -5.338  |
| ATOM | 317 | O5'  | DG | 11 | 18.506 | 2.426  | -4.949  |
| ATOM | 318 | C5'  | DG | 11 | 19.021 | 3.766  | -5.087  |
| ATOM | 319 | H5'1 | DG | 11 | 19.293 | 3.907  | -6.118  |
| ATOM | 320 | H5'2 | DG | 11 | 19.983 | 3.839  | -4.532  |
| ATOM | 321 | C4'  | DG | 11 | 18.073 | 4.911  | -4.617  |
| ATOM | 322 | H4'  | DG | 11 | 18.476 | 5.854  | -4.953  |
| ATOM | 323 | O4'  | DG | 11 | 16.763 | 4.676  | -5.202  |
| ATOM | 324 | C1'  | DG | 11 | 15.709 | 4.700  | -4.217  |
| ATOM | 325 | H1'  | DG | 11 | 15.298 | 5.732  | -4.093  |
| ATOM | 326 | N9   | DG | 11 | 14.616 | 3.811  | -4.598  |
| ATOM | 327 | C8   | DG | 11 | 14.612 | 2.442  | -4.650  |
| ATOM | 328 | H8   | DG | 11 | 15.484 | 1.851  | -4.373  |
| ATOM | 329 | N7   | DG | 11 | 13.475 | 1.932  | -5.104  |
| ATOM | 330 | C5   | DG | 11 | 12.619 | 3.003  | -5.298  |
| ATOM | 331 | C6   | DG | 11 | 11.209 | 3.076  | -5.624  |
| ATOM | 332 | O6   | DG | 11 | 10.437 | 2.178  | -5.916  |
| ATOM | 333 | N1   | DG | 11 | 10.765 | 4.383  | -5.738  |
| ATOM | 334 | H1   | DG | 11 | 9.855  | 4.486  | -6.146  |
| ATOM | 335 | C2   | DG | 11 | 11.479 | 5.480  | -5.408  |
| ATOM | 336 | N2   | DG | 11 | 10.850 | 6.633  | -5.442  |
| ATOM | 337 | H21  | DG | 11 | 9.857  | 6.671  | -5.626  |
| ATOM | 338 | H22  | DG | 11 | 11.370 | 7.492  | -5.292  |
| ATOM | 339 | N3   | DG | 11 | 12.768 | 5.480  | -5.053  |
| ATOM | 340 | C4   | DG | 11 | 13.366 | 4.218  | -5.007  |
| ATOM | 341 | C3'  | DG | 11 | 17.822 | 4.938  | -3.090  |
| ATOM | 342 | H3'  | DG | 11 | 18.584 | 4.372  | -2.544  |
| ATOM | 343 | C2'  | DG | 11 | 16.414 | 4.313  | -2.922  |
| ATOM | 344 | H2'1 | DG | 11 | 16.575 | 3.244  | -2.896  |
| ATOM | 345 | H2'2 | DG | 11 | 15.791 | 4.610  | -2.054  |
| ATOM | 346 | O3'  | DG | 11 | 17.845 | 6.328  | -2.630  |
| ATOM | 347 | P    | DT | 12 | 17.547 | 6.779  | -1.090  |
| ATOM | 348 | O1P  | DT | 12 | 18.404 | 7.929  | -0.642  |
| ATOM | 349 | O2P  | DT | 12 | 17.548 | 5.652  | -0.113  |
| ATOM | 350 | O5'  | DT | 12 | 15.983 | 7.288  | -1.323  |
| ATOM | 351 | C5'  | DT | 12 | 15.726 | 8.490  | -2.086  |
| ATOM | 352 | H5'1 | DT | 12 | 16.068 | 8.351  | -3.116  |
| ATOM | 353 | H5'2 | DT | 12 | 16.224 | 9.341  | -1.624  |
| ATOM | 354 | C4'  | DT | 12 | 14.222 | 8.751  | -2.059  |
| ATOM | 355 | H4'  | DT | 12 | 13.988 | 9.576  | -2.715  |
| ATOM | 356 | O4'  | DT | 12 | 13.454 | 7.606  | -2.511  |
| ATOM | 357 | C1'  | DT | 12 | 12.204 | 7.490  | -1.761  |

|      |     |      |    |    |        |        |        |
|------|-----|------|----|----|--------|--------|--------|
| ATOM | 358 | H1'  | DT | 12 | 11.494 | 8.141  | -2.226 |
| ATOM | 359 | N1   | DT | 12 | 11.761 | 6.071  | -1.723 |
| ATOM | 360 | C6   | DT | 12 | 12.715 | 5.103  | -1.437 |
| ATOM | 361 | H6   | DT | 12 | 13.725 | 5.473  | -1.165 |
| ATOM | 362 | C5   | DT | 12 | 12.404 | 3.799  | -1.515 |
| ATOM | 363 | C7   | DT | 12 | 13.425 | 2.718  | -1.120 |
| ATOM | 364 | H71  | DT | 12 | 12.949 | 1.942  | -0.513 |
| ATOM | 365 | H72  | DT | 12 | 13.751 | 2.186  | -2.030 |
| ATOM | 366 | H73  | DT | 12 | 14.268 | 3.144  | -0.581 |
| ATOM | 367 | C4   | DT | 12 | 11.092 | 3.404  | -2.006 |
| ATOM | 368 | O4   | DT | 12 | 10.717 | 2.234  | -2.136 |
| ATOM | 369 | N3   | DT | 12 | 10.199 | 4.425  | -2.280 |
| ATOM | 370 | H3   | DT | 12 | 9.363  | 4.152  | -2.780 |
| ATOM | 371 | C2   | DT | 12 | 10.450 | 5.743  | -2.124 |
| ATOM | 372 | O2   | DT | 12 | 9.570  | 6.581  | -2.366 |
| ATOM | 373 | C3'  | DT | 12 | 13.684 | 9.084  | -0.657 |
| ATOM | 374 | H3'  | DT | 12 | 14.504 | 9.118  | 0.118  |
| ATOM | 375 | C2'  | DT | 12 | 12.637 | 8.016  | -0.376 |
| ATOM | 376 | H2'1 | DT | 12 | 13.123 | 7.256  | 0.259  |
| ATOM | 377 | H2'2 | DT | 12 | 11.779 | 8.365  | 0.228  |
| ATOM | 378 | O3'  | DT | 12 | 13.040 | 10.399 | -0.713 |
| ATOM | 379 | P    | DA | 13 | 12.522 | 11.143 | 0.632  |
| ATOM | 380 | O1P  | DA | 13 | 12.689 | 12.638 | 0.440  |
| ATOM | 381 | O2P  | DA | 13 | 13.202 | 10.682 | 1.919  |
| ATOM | 382 | O5'  | DA | 13 | 10.934 | 10.705 | 0.562  |
| ATOM | 383 | C5'  | DA | 13 | 10.102 | 11.365 | -0.364 |
| ATOM | 384 | H5'1 | DA | 13 | 10.504 | 11.201 | -1.417 |
| ATOM | 385 | H5'2 | DA | 13 | 10.156 | 12.418 | -0.229 |
| ATOM | 386 | C4'  | DA | 13 | 8.618  | 10.894 | -0.331 |
| ATOM | 387 | H4'  | DA | 13 | 8.074  | 11.435 | -1.130 |
| ATOM | 388 | O4'  | DA | 13 | 8.599  | 9.445  | -0.553 |
| ATOM | 389 | C1'  | DA | 13 | 7.920  | 8.788  | 0.539  |
| ATOM | 390 | H1'  | DA | 13 | 6.829  | 8.681  | 0.279  |
| ATOM | 391 | N9   | DA | 13 | 8.501  | 7.453  | 0.752  |
| ATOM | 392 | C8   | DA | 13 | 9.695  | 7.125  | 1.335  |
| ATOM | 393 | H8   | DA | 13 | 10.379 | 7.854  | 1.683  |
| ATOM | 394 | N7   | DA | 13 | 9.974  | 5.843  | 1.404  |
| ATOM | 395 | C5   | DA | 13 | 8.827  | 5.237  | 0.885  |
| ATOM | 396 | C6   | DA | 13 | 8.385  | 3.915  | 0.680  |
| ATOM | 397 | N6   | DA | 13 | 9.097  | 2.844  | 0.909  |
| ATOM | 398 | H61  | DA | 13 | 8.667  | 1.928  | 0.781  |
| ATOM | 399 | H62  | DA | 13 | 10.008 | 2.908  | 1.340  |
| ATOM | 400 | N1   | DA | 13 | 7.206  | 3.641  | 0.141  |
| ATOM | 401 | C2   | DA | 13 | 6.449  | 4.645  | -0.270 |
| ATOM | 402 | H2   | DA | 13 | 5.511  | 4.323  | -0.741 |
| ATOM | 403 | N3   | DA | 13 | 6.670  | 5.933  | -0.128 |
| ATOM | 404 | C4   | DA | 13 | 7.929  | 6.267  | 0.441  |
| ATOM | 405 | C3'  | DA | 13 | 7.986  | 11.163 | 1.078  |
| ATOM | 406 | H3'  | DA | 13 | 8.541  | 11.856 | 1.683  |
| ATOM | 407 | C2'  | DA | 13 | 7.982  | 9.767  | 1.734  |
| ATOM | 408 | H2'1 | DA | 13 | 8.920  | 9.641  | 2.279  |
| ATOM | 409 | H2'2 | DA | 13 | 7.148  | 9.616  | 2.407  |
| ATOM | 410 | O3'  | DA | 13 | 6.645  | 11.623 | 0.883  |
| ATOM | 411 | P    | DT | 14 | 5.696  | 11.974 | 2.160  |
| ATOM | 412 | O1P  | DT | 14 | 4.903  | 13.231 | 1.953  |
| ATOM | 413 | O2P  | DT | 14 | 6.437  | 12.101 | 3.454  |
| ATOM | 414 | O5'  | DT | 14 | 4.670  | 10.702 | 2.103  |
| ATOM | 415 | C5'  | DT | 14 | 3.753  | 10.591 | 0.960  |
| ATOM | 416 | H5'1 | DT | 14 | 4.279  | 10.732 | -0.003 |
| ATOM | 417 | H5'2 | DT | 14 | 3.023  | 11.359 | 1.037  |
| ATOM | 418 | C4'  | DT | 14 | 3.062  | 9.186  | 0.996  |
| ATOM | 419 | H4'  | DT | 14 | 2.489  | 9.061  | 0.092  |
| ATOM | 420 | O4'  | DT | 14 | 4.093  | 8.187  | 1.113  |
| ATOM | 421 | C1'  | DT | 14 | 3.491  | 7.006  | 1.780  |
| ATOM | 422 | H1'  | DT | 14 | 2.937  | 6.414  | 1.012  |
| ATOM | 423 | N1   | DT | 14 | 4.546  | 6.231  | 2.509  |
| ATOM | 424 | C6   | DT | 14 | 5.554  | 6.926  | 3.179  |
| ATOM | 425 | H6   | DT | 14 | 5.448  | 7.987  | 3.222  |
| ATOM | 426 | C5   | DT | 14 | 6.587  | 6.262  | 3.761  |
| ATOM | 427 | C7   | DT | 14 | 7.638  | 6.983  | 4.545  |
| ATOM | 428 | H71  | DT | 14 | 7.699  | 6.548  | 5.584  |
| ATOM | 429 | H72  | DT | 14 | 8.606  | 6.826  | 4.111  |

|      |     |      |     |    |        |        |       |
|------|-----|------|-----|----|--------|--------|-------|
| ATOM | 430 | H73  | DT  | 14 | 7.450  | 8.053  | 4.634 |
| ATOM | 431 | C4   | DT  | 14 | 6.635  | 4.787  | 3.697 |
| ATOM | 432 | O4   | DT  | 14 | 7.509  | 4.060  | 4.096 |
| ATOM | 433 | N3   | DT  | 14 | 5.511  | 4.200  | 3.154 |
| ATOM | 434 | H3   | DT  | 14 | 5.464  | 3.196  | 3.281 |
| ATOM | 435 | C2   | DT  | 14 | 4.491  | 4.838  | 2.462 |
| ATOM | 436 | O2   | DT  | 14 | 3.622  | 4.189  | 1.919 |
| ATOM | 437 | C3'  | DT  | 14 | 2.152  | 9.005  | 2.234 |
| ATOM | 438 | H3'  | DT  | 14 | 2.479  | 9.750  | 2.999 |
| ATOM | 439 | C2'  | DT  | 14 | 2.461  | 7.596  | 2.735 |
| ATOM | 440 | H2'1 | DT  | 14 | 2.860  | 7.695  | 3.755 |
| ATOM | 441 | H2'2 | DT  | 14 | 1.571  | 6.926  | 2.753 |
| ATOM | 442 | O3'  | DT  | 14 | 0.766  | 9.176  | 1.828 |
| ATOM | 443 | P    | DA  | 15 | -0.430 | 9.160  | 2.950 |
| ATOM | 444 | O1P  | DA  | 15 | -1.615 | 9.905  | 2.465 |
| ATOM | 445 | O2P  | DA  | 15 | -0.085 | 9.743  | 4.296 |
| ATOM | 446 | O5'  | DA  | 15 | -0.705 | 7.580  | 3.013 |
| ATOM | 447 | C5'  | DA  | 15 | -1.234 | 6.898  | 1.818 |
| ATOM | 448 | H5'1 | DA  | 15 | -0.522 | 6.980  | 0.982 |
| ATOM | 449 | H5'2 | DA  | 15 | -2.203 | 7.297  | 1.496 |
| ATOM | 450 | C4'  | DA  | 15 | -1.415 | 5.424  | 2.204 |
| ATOM | 451 | H4'  | DA  | 15 | -1.756 | 4.829  | 1.332 |
| ATOM | 452 | O4'  | DA  | 15 | -0.170 | 4.832  | 2.673 |
| ATOM | 453 | C1'  | DA  | 15 | -0.363 | 4.142  | 3.922 |
| ATOM | 454 | H1'  | DA  | 15 | -0.580 | 3.069  | 3.735 |
| ATOM | 455 | N9   | DA  | 15 | 0.869  | 4.327  | 4.705 |
| ATOM | 456 | C8   | DA  | 15 | 1.379  | 5.508  | 5.164 |
| ATOM | 457 | H8   | DA  | 15 | 0.863  | 6.441  | 5.026 |
| ATOM | 458 | N7   | DA  | 15 | 2.565  | 5.447  | 5.744 |
| ATOM | 459 | C5   | DA  | 15 | 2.893  | 4.070  | 5.659 |
| ATOM | 460 | C6   | DA  | 15 | 3.943  | 3.229  | 6.089 |
| ATOM | 461 | N6   | DA  | 15 | 4.978  | 3.666  | 6.776 |
| ATOM | 462 | H61  | DA  | 15 | 5.749  | 3.061  | 6.989 |
| ATOM | 463 | H62  | DA  | 15 | 5.030  | 4.633  | 7.101 |
| ATOM | 464 | N1   | DA  | 15 | 3.974  | 1.936  | 5.849 |
| ATOM | 465 | C2   | DA  | 15 | 2.967  | 1.409  | 5.197 |
| ATOM | 466 | H2   | DA  | 15 | 3.032  | 0.332  | 5.057 |
| ATOM | 467 | N3   | DA  | 15 | 1.838  | 1.987  | 4.746 |
| ATOM | 468 | C4   | DA  | 15 | 1.842  | 3.362  | 4.957 |
| ATOM | 469 | C3'  | DA  | 15 | -2.466 | 5.250  | 3.351 |
| ATOM | 470 | H3'  | DA  | 15 | -3.044 | 6.150  | 3.569 |
| ATOM | 471 | C2'  | DA  | 15 | -1.617 | 4.786  | 4.523 |
| ATOM | 472 | H2'1 | DA  | 15 | -1.349 | 5.646  | 5.106 |
| ATOM | 473 | H2'2 | DA  | 15 | -2.218 | 4.192  | 5.239 |
| ATOM | 474 | O3'  | DA  | 15 | -3.378 | 4.213  | 2.889 |
| ATOM | 475 | P    | DT3 | 16 | -4.648 | 3.717  | 3.802 |
| ATOM | 476 | O1P  | DT3 | 16 | -5.706 | 3.284  | 2.819 |
| ATOM | 477 | O2P  | DT3 | 16 | -5.231 | 4.703  | 4.791 |
| ATOM | 478 | O5'  | DT3 | 16 | -3.969 | 2.438  | 4.592 |
| ATOM | 479 | C5'  | DT3 | 16 | -3.624 | 1.242  | 3.838 |
| ATOM | 480 | H5'1 | DT3 | 16 | -2.963 | 1.587  | 3.063 |
| ATOM | 481 | H5'2 | DT3 | 16 | -4.528 | 0.739  | 3.397 |
| ATOM | 482 | C4'  | DT3 | 16 | -2.841 | 0.248  | 4.741 |
| ATOM | 483 | H4'  | DT3 | 16 | -2.478 | -0.595 | 4.118 |
| ATOM | 484 | O4'  | DT3 | 16 | -1.645 | 0.949  | 5.260 |
| ATOM | 485 | C1'  | DT3 | 16 | -1.227 | 0.239  | 6.460 |
| ATOM | 486 | H1'  | DT3 | 16 | -0.668 | -0.642 | 6.068 |
| ATOM | 487 | N1   | DT3 | 16 | -0.335 | 1.040  | 7.284 |
| ATOM | 488 | C6   | DT3 | 16 | -0.689 | 2.408  | 7.483 |
| ATOM | 489 | H6   | DT3 | 16 | -1.623 | 2.724  | 7.108 |
| ATOM | 490 | C5   | DT3 | 16 | 0.169  | 3.209  | 8.164 |
| ATOM | 491 | C7   | DT3 | 16 | -0.187 | 4.691  | 8.381 |
| ATOM | 492 | H71  | DT3 | 16 | -0.348 | 4.891  | 9.445 |
| ATOM | 493 | H72  | DT3 | 16 | 0.606  | 5.325  | 8.003 |
| ATOM | 494 | H73  | DT3 | 16 | -1.137 | 4.919  | 7.895 |
| ATOM | 495 | C4   | DT3 | 16 | 1.401  | 2.684  | 8.725 |
| ATOM | 496 | O4   | DT3 | 16 | 2.200  | 3.329  | 9.364 |
| ATOM | 497 | N3   | DT3 | 16 | 1.652  | 1.345  | 8.457 |
| ATOM | 498 | H3   | DT3 | 16 | 2.519  | 0.953  | 8.771 |
| ATOM | 499 | C2   | DT3 | 16 | 0.831  | 0.463  | 7.786 |
| ATOM | 500 | O2   | DT3 | 16 | 1.242  | -0.676 | 7.600 |
| ATOM | 501 | C3'  | DT3 | 16 | -3.600 | -0.273 | 6.007 |

|      |     |      |     |    |        |        |       |
|------|-----|------|-----|----|--------|--------|-------|
| ATOM | 502 | H3'  | DT3 | 16 | -4.469 | 0.347  | 6.176 |
| ATOM | 503 | C2'  | DT3 | 16 | -2.564 | -0.141 | 7.137 |
| ATOM | 504 | H2'1 | DT3 | 16 | -2.900 | 0.672  | 7.795 |
| ATOM | 505 | H2'2 | DT3 | 16 | -2.459 | -1.033 | 7.700 |
| ATOM | 506 | O3'  | DT3 | 16 | -3.941 | -1.670 | 5.780 |
| ATOM | 507 | H3T  | DT3 | 16 | -4.550 | -1.920 | 6.499 |
| TER  |     |      |     |    |        |        |       |
| END  |     |      |     |    |        |        |       |
